# Supplementary material for: Transformational Leadership and Psychological Well-Being of Service-Oriented Staff: Hybrid Data Synthesis Technique
Source: MDPI journal article supplement (doi:10.3390/ijerph19138189), 2022-07-04
Supplement: s1 [file s1]

| Authors                    | Year | Sample Size | Outcome                                                                       | Service Sector                 | Gender Proportion |
|----------------------------|------|-------------|-------------------------------------------------------------------------------|--------------------------------|-------------------|
| Mufeed [47]                | 2018 | 161         | Quality of work life                                                          | Education                      | Male high         |
| George et al. [48]         | 2017 | 242         | Job stress                                                                    | Education                      | Male high         |
| Arnold and Walsh [16]      | 2015 | 215         | General health                                                                | Customer service               | Male high         |
| Huettermann and Bruch [49] | 2019 | 15952       | Emotional exhaustion,<br>engagement                                           | Customer<br>service/management | Male high         |
| Jena et al. [50]           | 2018 | 511         | General well-being                                                            | Service employee               | Male high         |
| Sabbah et al. [19]         | 2020 | 260         | Work Effort,<br>effectiveness,<br>satisfaction, physical and<br>mental health | Healthcare                     | Female only       |
| Walsh and Arnold [51]      | 2020 | 246         | Psychological well-being                                                      | Retail/sales/banking           | Male high         |
| Nielsen et al. [52]        | 2008 | 188         | Positive mind state                                                           | Healthcare                     | Female high       |
| Gillet et al. [53]         | 2013 | 343         | Quality of work life                                                          | Healthcare                     | Female high       |
| Allameh et al. [54]        | 2016 | 217         | Overall health                                                                | Healthcare                     | Female high       |
| Ding et al. [55]           | 2020 | 406         | Psychological well-being                                                      | Diverse                        | Female high       |
| Arnold et al. [56]         | 2007 | 319         | Affective well-being                                                          | Healthcare                     | Female high       |
| Liu et al. [11]            | 2010 | 297         | Work stress, stress<br>symptoms, job<br>satisfaction,                         | Diverse                        | Male high         |
| Montano et al. [23]        | 2017 | 8798        | Multiple outcomes                                                             | Diverse                        | Male high         |
| Lee and Kim [57]           | 2012 | 300         | General well-being                                                            | Healthcare                     | Female only       |
| Irshad et al. [20]         | 2021 | 232         | Psychological well-being                                                      | Healthcare                     | Female high       |

**Supplementary Table S1.** List of studies included in the quantitative analysis
