# Supplementary material for: Transformational Leadership and Psychological Well-Being of Service-Oriented Staff: Hybrid Data Synthesis Technique
Source: MDPI journal article supplement (doi:10.3390/ijerph19138189), 2022-07-04
Supplement: s1 [file s1]

### Qualitative studies included in the data mining analysis

17. E-Rubbab, U.; Farid, T.; Iqbal, S.; Saeed, I.; Irfan, S.; Akhtar, T. Impact of Supportive Leadership During Covid-19 on Nurses' Well-Being: The Mediating Role of Psychological Capital. *Front Psychol.* 2021, 12, 695091. <https://doi.org/10.3389/fpsyg.2021.695091>.
70. Kelloway, E.K.; Turner, N.; Barling, J.; Loughlin, C.A. Transformational Leadership and Employee Psychological Well-Being: The Mediating Role of Employee Trust in Leadership. *Work Stress* **2012**, 26, 39–55. <https://doi.org/10.1080/02678373.2012.660774>.
74. Nanjundeswaraswamy, T.S.; Swamy, D.R. An Empirical Research on the Relationship between Quality of Work Life and Leadership Styles in SMEs. *Bangladesh E-J. Sociol.* 2015, 12, 41–52.
75. McCabe, M.P.; Beattie, E.; Karantzas, G.; Mellor, D.; Sanders, K.; Busija, L.; Goodenough, B.; Bennett, M.; von Treuer, K.; Byers, J. (2018). A Randomized Controlled Trial to Evaluate the Effectiveness of a Staff Training Program to Implement Consumer Directed Care on Resident Quality of Life in Residential Aged Care. *BMC Geriatr.* 2018,18, 1–8. <https://doi.org/10.1186/s12877-018-0966-1>
76. McCabe, M.P.; Beattie, E.; Karantzas, G.; Mellor, D.; Sanders, K.; Busija, L.; Goodenough, B.; Bennett, M.; von Treuer, K.; Byers, J. Consumer Directed Care in Residential Aged Care: An Evaluation of a Staff Training Program. *Aging. Ment. Health.* 2020, 24, 673–678. <https://doi.org/10.1080/13607863.2019.1574711>
77. Zbierowski, P. Happy Followers of Positive Leaders. The Effect of Positive Leadership on Well-Being of Followers. *J. Posit. Manag.* 2019, 10, 51–61. <https://doi.org/10.12775/JPM.2019.016>
78. Bhatt, H.C. Leadership Styles and Quality of Work Life in Small and Medium Scale Enterprises of Kumoun Region of Uttarakhand. *J. Strategic Hum. Resour. Manag.* 2018, 7, 23–32.
79. Alimo-Metcalfe, B.; Alban-Metcalfe, J. More (good) Leaders for the Public Sector. *Int. J. Public Sect. Manag.* 2006, 19, 293–315. <https://doi.org/10.1108/09513550610669167>
80. Vries, J.; Koster, R.; Stam, D. (2016). Safety Does Not Happen by Accident: Antecedents To A Safer Warehouse. *Prod Oper Manag.* 2016, 25, 1377–1390. <https://doi.org/10.1111/poms.12546>
81. Grau-Alberola, E.; Figueiredo-Ferraz, H.; López-Vflichez, J.J.; Gil-Monte, P.R. The Healthy Management: The Moderator Role of Transformational Leadership on Health Workers. *An. de Psicol.* 2022, 38, 128–138. <https://doi.org/10.6018/analesps.471121>
82. Ahmed, O.M.; Ishak, A.K.; Kamil, B.A.M. (2019). Transformational Leadership and Employee Psychological Wellbeing among Faculty Staff: The Mediating Role of Self-Efficacy. *IJMAE.* 2019, 6, 184–197.
83. Hultgren, U.; Palmer, S.; O'Riordan, S. Can Cognitive Behavioural Team Coaching Increase Well-being? *Coaching Psychologist.* 2013, 9, 100–110.

84. Jambawo, S. Transformational Leadership and Ethical Leadership: Their Significance in the Mental Healthcare System. *Br. J. Nurs.* 2018, 27, 998–1001. <https://doi.org/10.12968/bjon.2018.27.17.998>
85. Moffat, J.; Sass, B.; Mckenzie, K.; Bhui, K. Enhancing Pathways & Mental Healthcare for BME groups: Learning between the Ideological and Operational. *Int Rev Psychiatry.* 2009, 21, 450–459. <https://doi.org/10.1080/09540260802202075>
86. i Solà, G.J.; i Badia, J.G.; Delgado Hito, P.; Campo Osaba, M.A.; Del Val García, J.L. Self-perception of leadership styles and behaviour in primary health care. *BMC Health Serv. Res.* 2016, 16, 1–9. <https://doi.org/10.1186/s12913-016-1819-2>
87. Cluff, C.C.; Colker, J.J. (2021). The Role of Interpersonal Exchange in Transformational Leadership. *Prof. Saf.* 2021, 66, 20–21.
88. Kensbock, J.M.; Boehm, S.A. The Role of Transformational Leadership in the Mental Health and Job Performance of Employees with Disabilities. *Int. J. Hum. Resour. Manag.* 2016, 27, 1580–1609. <https://doi.org/10.1080/09585192.2015.1079231>
89. Choy-Brown, M.; Stanhope, V.; Wackstein, N.; Delany Cole, H. (2020). Do Social Workers Lead Differently? Examining Associations with Leadership Style and Organizational Factors. *Hum. Serv. Organ. Manag. Leadersh. Gov.* 2020, 44, 332–342. <https://doi.org/10.1080/23303131.2020.1767744>
90. Garman, A.N.; Davis-Lenane, D.; Corrigan, P.W. Factor Structure of the Transformational Leadership Model in Human Service Teams. *J. Organ. Behav.* 2003, 24, 803–812. <https://doi.org/10.1002/job.201>
91. Parker, P. A.; Sorensen, J. Emotional Intelligence and Leadership Skills among NHS Managers: An Empirical Investigation. *International Journal of Clinical Leadership.* 2008, 16, 137–142.
92. Vella, S.A.; Oades, L.G.; Crowe, T.P. A Pilot Test of Transformational Leadership Training for Sports Coaches: Impact on the Developmental Experiences of Adolescent Int J Sports Sci Coach. 2013, 8, 513–530.
93. Hill, D.M.; Brown, G.; Lambert, T.L.; Mackintosh, K.; Knight, C.; Gorczynski, P. Factors Perceived to Affect the Wellbeing and Mental Health of Coaches and Practitioners Working within Elite Sport. *Sport Exerc. Perform. Psychol.* 2021, 10, 504–518. <https://doi.org/10.1037/spy0000263>
94. Carleton, E.L.; Barling, J.; Trivisonno, M. Leaders' Trait Mindfulness and Transformational Leadership: The Mediating Roles of Leaders' Positive Affect and Leadership Self-Efficacy. *Can. J. Behav. Sci.* 2018, 50, 185–194. <https://doi.org/10.1037/cbs0000103>
95. Rowold, J.; Borgmann, L.; Bormann, K. Which Leadership Constructs Are Important for Predicting Job Satisfaction, Affective Commitment, and Perceived Job Performance in Profit versus Nonprofit Organizations? *Nonprofit Manag Leadersh.* 2014, 25, 147–164. <https://doi.org/10.1002/nml.21116>

96. Bryant, P.; Butcher, J.T.; O'Connor, J. Improving School Leadership: The Connection of Transformational Leadership and Psychological Well-Being of the Followers. *School Leadership Review*. 2016, 11 Available at: <https://scholarworks.sfasu.edu/slr/vol11/iss2/6>
97. Chu, H.; Qiang, B.; Zhou, J.; Qiu, X.; Yang, X.; Qiao, Z.; Song, X.; Zhao, E.; Cao, D.; Yang, Y. The Impact of Transformational Leadership on Physicians' Performance in China: A Cross-Level Mediation Model. *Front. Psychol.* 2021, 12, 586475. <http://lps3.doi.org.kims.kmu.ac.kr/10.3389/fpsyg.2021.586475>
98. Decuyper, A.; Audenaert, M.; Decramer, A. When Mindfulness Interacts With Neuroticism to Enhance Transformational Leadership: The Role of Psychological Need Satisfaction. *Front Psychol.* 2018, 9, 2588. doi: 10.3389/fpsyg.2018.02588.
99. Tafvelin, S.; Nielsen, K.; von Thiele Schwarz, U.; Stenling, A. Leading Well is a Matter of Resources: Leader Vigour and Peer Support Augments the Relationship Between Transformational Leadership and Burnout. *Work & Stress*. 2019, 33, 156–172. <https://doi.org/10.1080/02678373.2018.1513961>
