# Supplementary figures and images for: Transformational Leadership and Psychological Well-Being of Service-Oriented Staff: Hybrid Data Synthesis Technique
Source: MDPI journal article supplement (doi:10.3390/ijerph19138189), 2022-07-04

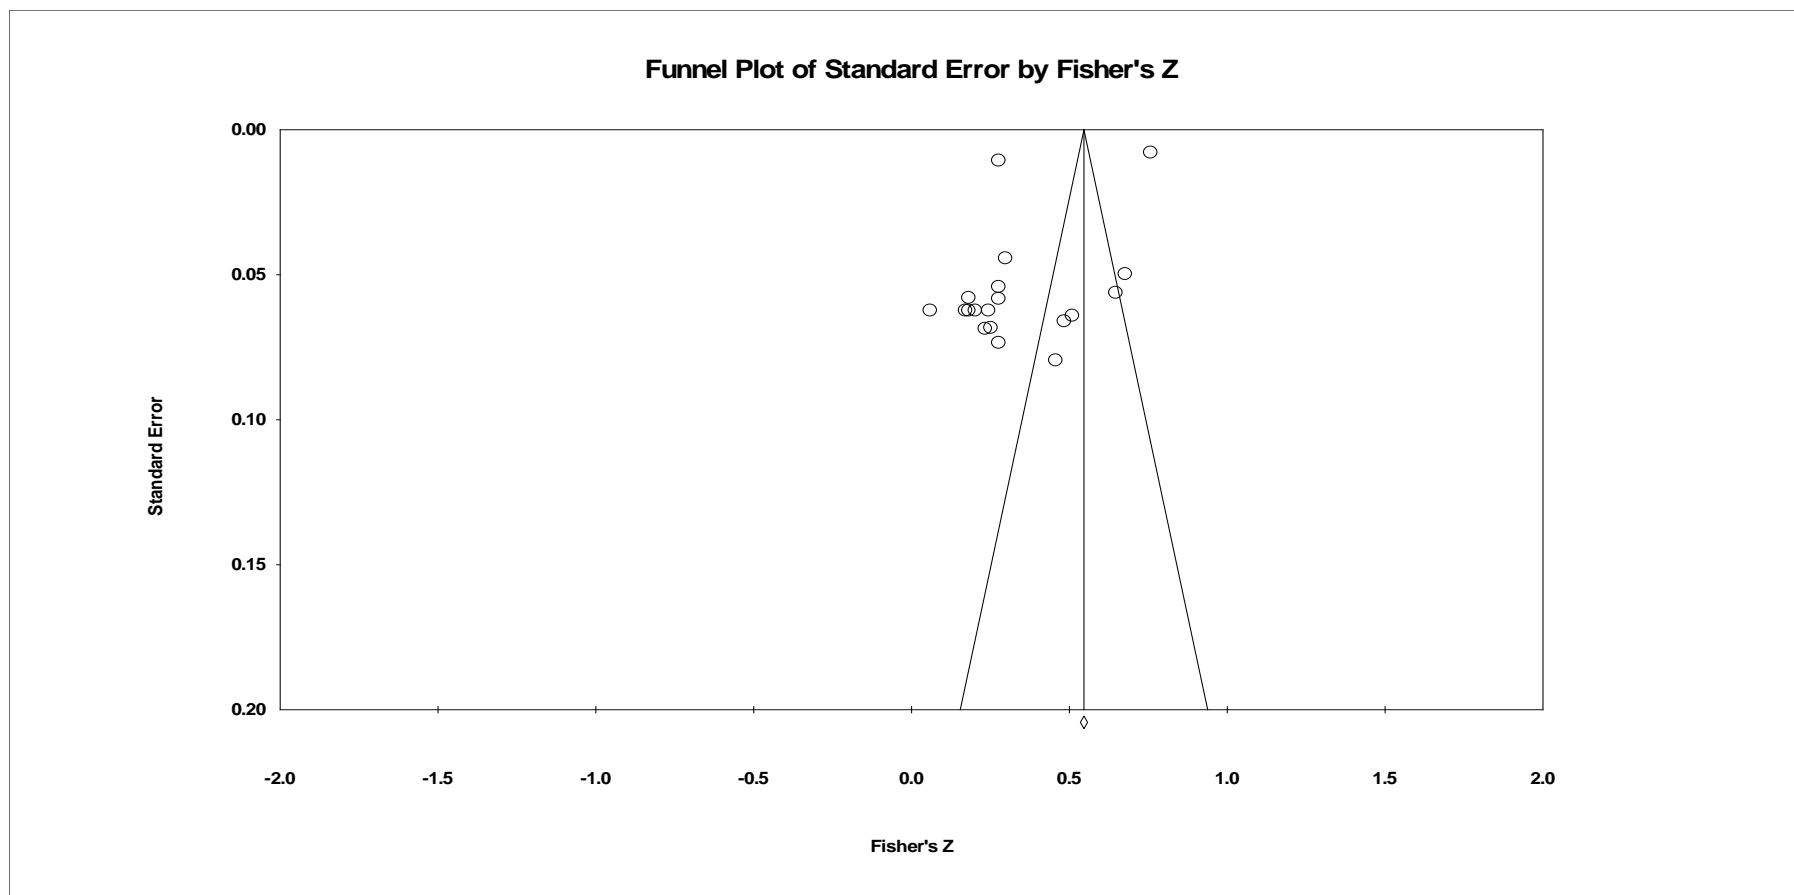

**Supplementary Figure S1.** Funnel plot of standard error by Fishers' Z

Supplement: s1 [file s1]
